# Supplementary material for: Adaptive evolution and demographic history contribute to the divergent population genetic structure of Potato virus Y between China and Japan
Source: PubMed Central journal article supplement (PMC5367074; doi:10.1111/eva.12459), 2017-03-02
Supplement: EVA-10-379-s002.pdf [file EVA-10-379-s002.pdf]

Figure S2

(A)

Date-randomization test performed on uced.mean

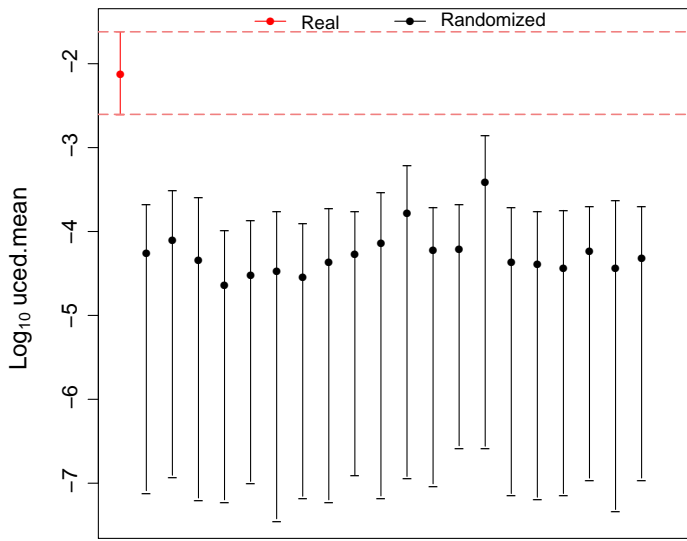

No Overlapping: DRT SUCCESSFULLY PASSED !!!

(B)

Date-randomization test performed on uced.mean

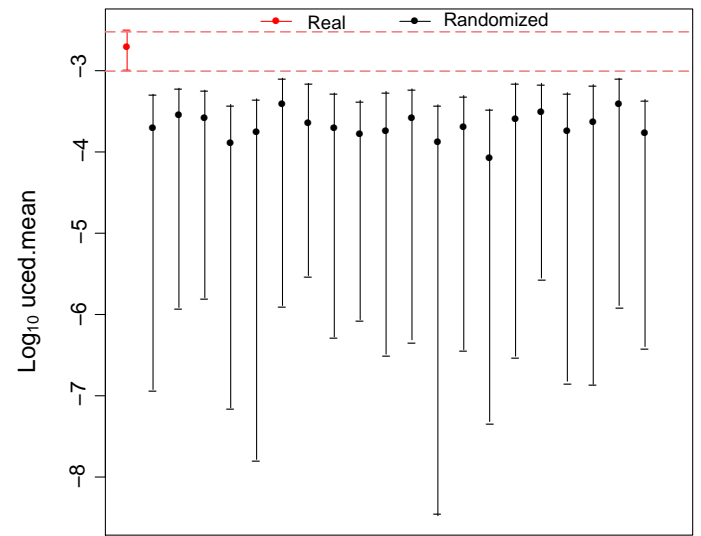

No Overlapping: DRT SUCCESSFULLY PASSED !!!

(C)

Date-randomization test performed on ucedMean

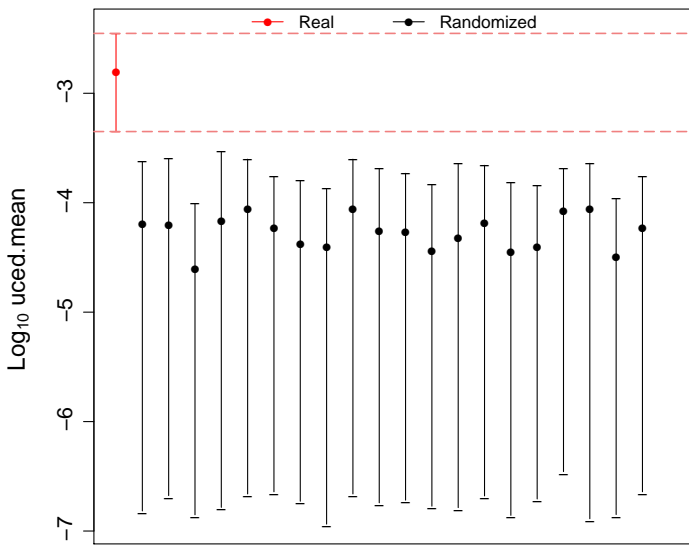

No Overlapping: DRT SUCCESSFULLY PASSED !!!

(D)

Date-randomization test performed on ucedMean

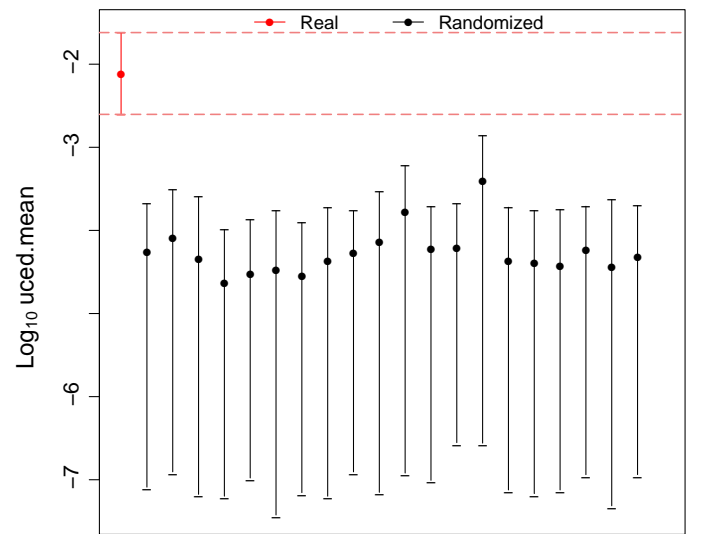

No Overlapping: DRT SUCCESSFULLY PASSED !!!
