# Supplementary material for: Adaptive evolution and demographic history contribute to the divergent population genetic structure of Potato virus Y between China and Japan
Source: PubMed Central journal article supplement (PMC5367074; doi:10.1111/eva.12459), 2017-03-02
Supplement: EVA-10-379-s003.pdf [file EVA-10-379-s003.pdf]

**Table S1** PVY isolates in this study

| Isolate      | Country             | Host                     | Date | Accession Number |          | Reference                |
|--------------|---------------------|--------------------------|------|------------------|----------|--------------------------|
|              |                     |                          |      | P1               | CP       |                          |
| SL053        | China: Guizhou      | <i>Solanum tuberosum</i> | 2005 | n/a              | EF063710 | Zhang & Liu, unpublished |
| FX24         | China: Shandong     | <i>Solanum tuberosum</i> | 2005 | n/a              | EF592514 | Yu et al, unpublished    |
| Fanzhen6     | China: Shandong     | <i>Solanum tuberosum</i> | 2005 | n/a              | EF592515 | Yu et al, unpublished    |
| Laiwu3       | China: Shandong     | <i>Solanum tuberosum</i> | 2005 | n/a              | EF592516 | Yu et al, unpublished    |
| Fanzhen8     | China: Shandong     | <i>Solanum tuberosum</i> | 2005 | n/a              | EF592521 | Liu, et al, unpublished  |
| Laiwu1       | China: Shandong     | <i>Solanum tuberosum</i> | 2005 | n/a              | EF592525 | Liu, et al, unpublished  |
| Laiwu9       | China: Shandong     | <i>Solanum tuberosum</i> | 2005 | n/a              | EF592526 | Liu, et al, unpublished  |
| Zhengzhou    | China: Henan        | <i>Solanum tuberosum</i> | 2007 | n/a              | JX872404 | Liu, et al, unpublished  |
| Lushi        | China: Henan        | <i>Solanum tuberosum</i> | 2008 | FJ423028         | n/a      | Liu, et al, unpublished  |
| Guiyang      | China: Guizhou      | <i>Solanum tuberosum</i> | 2008 | FJ423029         | n/a      | Liu, et al, unpublished  |
| Caohai       | China: Henan        | <i>Solanum tuberosum</i> | 2008 | FJ423030         | n/a      | Liu, et al, unpublished  |
| keshan       | China: Heilongjiang | <i>Solanum tuberosum</i> | 2008 | FJ766536         | n/a      | Liu, et al, unpublished  |
| Minquan      | China: Henan        | <i>Solanum tuberosum</i> | 2008 | FJ986300         | n/a      | Liu, et al, unpublished  |
| Heilongjiang | China: Heilongjiang | <i>Solanum tuberosum</i> | 2008 | GU074001         | n/a      | Liu, et al, unpublished  |
| Dalian       | China: Liaoning     | <i>Solanum tuberosum</i> | 2008 | GU074002         | n/a      | Liu, et al, unpublished  |
| HN1          | China: Hunan        | <i>Solanum tuberosum</i> | 2007 | HQ631374         | n/a      | Hu et al, 2009           |
| HeB12        | China: Hebei        | <i>Solanum tuberosum</i> | 2012 | KF771013         | KC282358 | This study               |
| HeB7         | China: Hebei        | <i>Solanum tuberosum</i> | 2012 | KF771012         | KC282359 | This study               |
| HeB5         | China: Hebei        | <i>Solanum tuberosum</i> | 2012 | KF771010         | KC282360 | This study               |
| HeB6         | China: Hebei        | <i>Solanum tuberosum</i> | 2012 | KF771011         | KC282361 | This study               |
| HeB2         | China: Hebei        | <i>Solanum tuberosum</i> | 2012 | KF771008         | KC282362 | This study               |
| HeB15        | China: Hebei        | <i>Solanum tuberosum</i> | 2012 | KF771014         | KC282363 | This study               |
| HeB26        | China: Hebei        | <i>Solanum tuberosum</i> | 2012 | KF771019         | KC282364 | This study               |
| HeB28        | China: Hebei        | <i>Solanum tuberosum</i> | 2012 | KF771020         | KC282365 | This study               |
| HeB19        | China: Hebei        | <i>Solanum tuberosum</i> | 2012 | KF771016         | KC282366 | This study               |

|       |               |                          |      |          |          |                 |
|-------|---------------|--------------------------|------|----------|----------|-----------------|
| HeB17 | China: Hebei  | <i>Solanum tuberosum</i> | 2012 | KF771015 | KC282367 | This study      |
| HeB23 | China: Hebei  | <i>Solanum tuberosum</i> | 2012 | KF771018 | KC282369 | This study      |
| HeB4  | China: Hebei  | <i>Solanum tuberosum</i> | 2012 | KF771009 | KC282370 | This study      |
| FQ04  | China: Fujian | <i>Solanum tuberosum</i> | 2011 | n/a      | KC296803 | This study      |
| FQ06  | China: Fujian | <i>Solanum tuberosum</i> | 2011 | KF722798 | KC296806 | This study      |
| FQ07  | China: Fujian | <i>Solanum tuberosum</i> | 2011 | n/a      | KC296815 | This study      |
| LH02  | China: Fujian | <i>Solanum tuberosum</i> | 2011 | KF722799 | KC296828 | This study      |
| LH05  | China: Fujian | <i>Solanum tuberosum</i> | 2011 | KF722800 | KC296826 | Shi et al, 2014 |
| LH09  | China: Fujian | <i>Solanum tuberosum</i> | 2011 | KF722801 | KC296790 | This study      |
| LH12  | China: Fujian | <i>Solanum tuberosum</i> | 2011 | n/a      | KC296789 | This study      |
| LH14  | China: Fujian | <i>Solanum tuberosum</i> | 2011 | KF722802 | KC296816 | Shi et al, 2014 |
| LH20  | China: Fujian | <i>Solanum tuberosum</i> | 2011 | n/a      | KC296818 | This study      |
| LH21  | China: Fujian | <i>Solanum tuberosum</i> | 2011 | KF722803 | KC296791 | Shi et al, 2014 |
| LH24  | China: Fujian | <i>Solanum tuberosum</i> | 2011 | KF722804 | n/a      | This study      |
| LY06  | China: Fujian | <i>Solanum tuberosum</i> | 2011 | KF722805 | KC296823 | This study      |
| LY08  | China: Fujian | <i>Solanum tuberosum</i> | 2011 | KF722806 | KC296793 | Shi et al, 2014 |
| LY09  | China: Fujian | <i>Solanum tuberosum</i> | 2011 | n/a      | KC296796 | This study      |
| LY12  | China: Fujian | <i>Solanum tuberosum</i> | 2011 | KF722807 | KC296794 | This study      |
| LY21  | China: Fujian | <i>Solanum tuberosum</i> | 2011 | KF722808 | KC296798 | This study      |
| LY30  | China: Fujian | <i>Solanum tuberosum</i> | 2011 | KF722809 | KC296800 | Shi et al, 2014 |
| LY31  | China: Fujian | <i>Solanum tuberosum</i> | 2011 | KF722810 | KC296792 | This study      |
| LY34  | China: Fujian | <i>Solanum tuberosum</i> | 2011 | n/a      | KC296821 | This study      |
| LY35  | China: Fujian | <i>Solanum tuberosum</i> | 2011 | KF722811 | n/a      | Shi et al, 2014 |
| QK09  | China: Fujian | <i>Solanum tuberosum</i> | 2011 | KF722812 | KC296824 | This study      |
| QK43  | China: Fujian | <i>Solanum tuberosum</i> | 2011 | KF722813 | n/a      | This study      |
| QK44  | China: Fujian | <i>Solanum tuberosum</i> | 2011 | KF722814 | KC296817 | Shi et al, 2014 |
| QK45  | China: Fujian | <i>Solanum tuberosum</i> | 2011 | KF722815 | KC296827 | This study      |
| QK47  | China: Fujian | <i>Solanum tuberosum</i> | 2011 | KF722816 | KC296810 | This study      |
| XQ02  | China: Fujian | <i>Solanum tuberosum</i> | 2011 | KF722817 | KC296822 | This study      |

|      |               |                          |      |          |          |                 |
|------|---------------|--------------------------|------|----------|----------|-----------------|
| XQ03 | China: Fujian | <i>Solanum tuberosum</i> | 2011 | KF722818 | KC296801 | This study      |
| XQ04 | China: Fujian | <i>Solanum tuberosum</i> | 2011 | KF722819 | KC296802 | Shi et al, 2014 |
| XQ05 | China: Fujian | <i>Solanum tuberosum</i> | 2012 | KF722820 | KC296825 | This study      |
| XQ08 | China: Fujian | <i>Solanum tuberosum</i> | 2012 | KF722821 | KC296797 | This study      |
| XQ09 | China: Fujian | <i>Solanum tuberosum</i> | 2012 | KF722822 | KC296799 | This study      |
| XQ10 | China: Fujian | <i>Solanum tuberosum</i> | 2012 | KF722823 | KC296811 | This study      |
| XQ11 | China: Fujian | <i>Solanum tuberosum</i> | 2012 | KF722824 | KC296804 | This study      |
| XT01 | China: Fujian | <i>Solanum tuberosum</i> | 2012 | KF722825 | KC296830 | This study      |
| XT02 | China: Fujian | <i>Solanum tuberosum</i> | 2012 | KF722826 | KC296820 | Shi et al, 2014 |
| XT03 | China: Fujian | <i>Solanum tuberosum</i> | 2012 | KF722827 | KC296831 | This study      |
| XT04 | China: Fujian | <i>Solanum tuberosum</i> | 2012 | KF722828 | KC296834 | Shi et al, 2014 |
| XT05 | China: Fujian | <i>Solanum tuberosum</i> | 2012 | KF722829 | KC296819 | This study      |
| XT07 | China: Fujian | <i>Solanum tuberosum</i> | 2012 | KF722830 | KC296814 | This study      |
| XT08 | China: Fujian | <i>Solanum tuberosum</i> | 2012 | KF722831 | KC296808 | Shi et al, 2014 |
| ZL01 | China: Fujian | <i>Solanum tuberosum</i> | 2012 | KF722832 | KC296807 | This study      |
| ZL02 | China: Fujian | <i>Solanum tuberosum</i> | 2012 | KF722833 | KC296795 | Shi et al, 2014 |
| ZL05 | China: Fujian | <i>Solanum tuberosum</i> | 2012 | n/a      | KC296832 | This study      |
| ZL06 | China: Fujian | <i>Solanum tuberosum</i> | 2012 | KF722834 | KC296805 | This study      |
| ZL07 | China: Fujian | <i>Solanum tuberosum</i> | 2012 | KF722835 | KC296833 | This study      |
| ZL08 | China: Fujian | <i>Solanum tuberosum</i> | 2012 | KF722836 | KC296813 | This study      |
| ZL09 | China: Fujian | <i>Solanum tuberosum</i> | 2012 | KF722837 | KC296835 | This study      |
| ZL10 | China: Fujian | <i>Solanum tuberosum</i> | 2012 | KF722838 | KC296809 | This study      |
| ZL11 | China: Fujian | <i>Solanum tuberosum</i> | 2012 | KF722839 | n/a      | This study      |
| ZL12 | China: Fujian | <i>Solanum tuberosum</i> | 2012 | n/a      | KC296829 | This study      |
| ZL13 | China: Fujian | <i>Solanum tuberosum</i> | 2012 | KF722840 | n/a      | This study      |
| ZL14 | China: Fujian | <i>Solanum tuberosum</i> | 2012 | KF722841 | KC296812 | This study      |
| CD16 | China: Hunan  | <i>Solanum tuberosum</i> | 2012 | KX451323 | KC296836 | This study      |
| CD28 | China: Hunan  | <i>Solanum tuberosum</i> | 2012 | KX451324 | KC296837 | This study      |
| CD34 | China: Hunan  | <i>Solanum tuberosum</i> | 2012 | n/a      | KC296838 | This study      |

|      |              |                          |      |          |          |            |
|------|--------------|--------------------------|------|----------|----------|------------|
| CD39 | China: Hunan | <i>Solanum tuberosum</i> | 2012 | KX451325 | KC296839 | This study |
| CD45 | China: Hunan | <i>Solanum tuberosum</i> | 2012 | KX451326 | KC296840 | This study |
| CS1  | China: Hunan | <i>Solanum tuberosum</i> | 2011 | KX451327 | KC296841 | This study |
| CS10 | China: Hunan | <i>Solanum tuberosum</i> | 2011 | KX451328 | KC296842 | This study |
| CS11 | China: Hunan | <i>Solanum tuberosum</i> | 2011 | KX451329 | KC296843 | This study |
| CS12 | China: Hunan | <i>Solanum tuberosum</i> | 2011 | KX451330 | KC296844 | This study |
| CS13 | China: Hunan | <i>Solanum tuberosum</i> | 2011 | KX451331 | KC296845 | This study |
| CS14 | China: Hunan | <i>Solanum tuberosum</i> | 2011 | KX451332 | KC296846 | This study |
| CS15 | China: Hunan | <i>Solanum tuberosum</i> | 2011 | KX451333 | KC296847 | This study |
| CS16 | China: Hunan | <i>Solanum tuberosum</i> | 2011 | KX451334 | KC296848 | This study |
| CS17 | China: Hunan | <i>Solanum tuberosum</i> | 2011 | KX451335 | KC296849 | This study |
| CS18 | China: Hunan | <i>Solanum tuberosum</i> | 2011 | KX451336 | KC296850 | This study |
| CS19 | China: Hunan | <i>Solanum tuberosum</i> | 2011 | KX451337 | KC296851 | This study |
| CS2  | China: Hunan | <i>Solanum tuberosum</i> | 2011 | KX451338 | KC296852 | This study |
| CS20 | China: Hunan | <i>Solanum tuberosum</i> | 2011 | KX451339 | KC296853 | This study |
| CS21 | China: Hunan | <i>Solanum tuberosum</i> | 2011 | KX451340 | KC296854 | This study |
| CS22 | China: Hunan | <i>Solanum tuberosum</i> | 2011 | KX451341 | KC296855 | This study |
| CS23 | China: Hunan | <i>Solanum tuberosum</i> | 2011 | KX451342 | KC296856 | This study |
| CS24 | China: Hunan | <i>Solanum tuberosum</i> | 2011 | KX451343 | n/a      | This study |
| CS26 | China: Hunan | <i>Solanum tuberosum</i> | 2011 | n/a      | KC296857 | This study |
| CS27 | China: Hunan | <i>Solanum tuberosum</i> | 2011 | n/a      | KC296858 | This study |
| CS28 | China: Hunan | <i>Solanum tuberosum</i> | 2011 | KX451344 | KC296859 | This study |
| CS29 | China: Hunan | <i>Solanum tuberosum</i> | 2011 | KX451345 | n/a      | This study |
| CS30 | China: Hunan | <i>Solanum tuberosum</i> | 2011 | n/a      | KC296861 | This study |
| CS31 | China: Hunan | <i>Solanum tuberosum</i> | 2011 | KX451346 | KC296862 | This study |
| CS36 | China: Hunan | <i>Solanum tuberosum</i> | 2011 | KX451347 | KC296863 | This study |
| CS37 | China: Hunan | <i>Solanum tuberosum</i> | 2011 | KX451348 | KC296864 | This study |
| CS4  | China: Hunan | <i>Solanum tuberosum</i> | 2011 | KX451349 | KC296865 | This study |
| CS5  | China: Hunan | <i>Solanum tuberosum</i> | 2011 | KX451350 | KC296866 | This study |

|          |                 |                          |           |          |          |                      |
|----------|-----------------|--------------------------|-----------|----------|----------|----------------------|
| CS9      | China: Hunan    | <i>Solanum tuberosum</i> | 2011      | KX451351 | n/a      | This study           |
| GZ2      | China: Guizhou  | <i>Solanum tuberosum</i> | 2011      | n/a      | KC506388 | Gao et al, 2013      |
| HeN12    | China: Henan    | <i>Solanum tuberosum</i> | 2012      | n/a      | KC506389 | Gao et al, 2013      |
| SD1      | China: Shandong | <i>Solanum tuberosum</i> | 2012      | n/a      | KC506394 | Gao et al, 2013      |
| GF_YL20  | China: Shaanxi  | <i>Solanum tuberosum</i> | 2011      | KJ634023 | KJ634023 | Gao et al, 2014      |
| ShX14    | China: Shaanxi  | <i>Solanum tuberosum</i> | 2011      | KJ634024 | KJ634024 | Gao et al, 2015      |
| CF_YL21  | China: Shaanxi  | <i>Solanum tuberosum</i> | 2011      | KJ801915 | KJ801915 | Chang et al, 2015    |
| HN2      | China: Hunan    | <i>Solanum tuberosum</i> | 2007      | GQ200836 | GQ200836 | Hu et al, 2009       |
| NTND6    | Japan: Kyushu   | <i>Solanum tuberosum</i> | 1995–2000 | AB331515 | AB331515 | Ogawa T, et al, 2008 |
| NTNOK105 | Japan: Okinawa  | <i>Solanum tuberosum</i> | 1995–2000 | AB331516 | AB331516 | Ogawa T, et al, 2008 |
| NTNHO90  | Japan: Hokkaido | <i>Solanum tuberosum</i> | 1995–2000 | AB331517 | AB331517 | Ogawa T, et al, 2008 |
| NTNNN99  | Japan: Honshu   | <i>Solanum tuberosum</i> | 1995–2000 | AB331518 | AB331518 | Ogawa T, et al, 2008 |
| NTNON92  | Japan: Kyushu   | <i>Solanum tuberosum</i> | 1995–2000 | AB331519 | AB331519 | Ogawa T, et al, 2008 |
| NTNHIR3  | Japan: Honshu   | <i>Solanum tuberosum</i> | 2012      | AB711143 | AB711143 | Ogawa T, et al, 2012 |
| NTNKGAM1 | Japan: Kyushu   | <i>Solanum tuberosum</i> | 2012      | AB711144 | AB711144 | Ogawa T, et al, 2012 |
| NTNKGAM2 | Japan: Kyushu   | <i>Solanum tuberosum</i> | 2012      | AB711145 | AB711145 | Ogawa T, et al, 2012 |
| NTNTK1   | Japan: Honshu   | <i>Solanum tuberosum</i> | 2012      | AB711146 | AB711146 | Ogawa T, et al, 2012 |
| OA021    | Japan: Honshu   | <i>Solanum tuberosum</i> | 2012      | AB711147 | AB711147 | Ogawa T, et al, 2012 |
| OA022    | Japan: Honshu   | <i>Solanum tuberosum</i> | 2012      | AB711148 | AB711148 | Ogawa T, et al, 2012 |
| OHO37    | Japan: Hokkaido | <i>Solanum tuberosum</i> | 2012      | AB711149 | AB711149 | Ogawa T, et al, 2012 |
| OKUM4    | Japan: Kyushu   | <i>Solanum tuberosum</i> | 2012      | AB711150 | AB711150 | Ogawa T, et al, 2012 |
| ONGI3    | Japan: Kyushu   | <i>Solanum tuberosum</i> | 2012      | AB711151 | AB711151 | Ogawa T, et al, 2012 |
| ONGOB6   | Japan: Kyushu   | <i>Solanum tuberosum</i> | 2012      | AB711152 | AB711152 | Ogawa T, et al, 2012 |
| OH       | Japan: Hokkaido | <i>Solanum tuberosum</i> | 2012      | AB714134 | AB714134 | Ogawa T, et al, 2012 |
| T13      | Japan: Hokkaido | <i>Solanum tuberosum</i> | 1989      | AB714135 | AB714135 | Ogawa T, et al, 2012 |
| NTN68    | Japan: Kyushu   | <i>Solanum tuberosum</i> | 1995–2000 | AB331526 | AB331541 | Ogawa T, et al, 2008 |
| NTND7    | Japan: Kyushu   | <i>Solanum tuberosum</i> | 1995–2000 | AB331521 | AB042811 | Ogawa T, et al, 2008 |
| NTNDG44  | Japan: Kyushu   | <i>Solanum tuberosum</i> | 1995–2000 | AB331529 | AB331543 | Ogawa T, et al, 2008 |
| NTNHO91  | Japan: Hokkaido | <i>Solanum tuberosum</i> | 1995–2000 | AB331535 | AB331548 | Ogawa T, et al, 2008 |

|          |                 |                          |           |          |          |                      |
|----------|-----------------|--------------------------|-----------|----------|----------|----------------------|
| NTNHO92  | Japan: Hokkaido | <i>Solanum tuberosum</i> | 1995–2000 | AB331536 | AB331549 | Ogawa T, et al, 2008 |
| NTNHO95  | Japan: Hokkaido | <i>Solanum tuberosum</i> | 1995–2000 | AB331537 | AB331550 | Ogawa T, et al, 2008 |
| NTNK     | Japan: Kyushu   | <i>Solanum tuberosum</i> | 1995–2000 | AB331528 | AB025417 | Ogawa T, et al, 2008 |
| NTNK110  | Japan: Kyushu   | <i>Solanum tuberosum</i> | 1995–2000 | AB331523 | AB331538 | Ogawa T, et al, 2008 |
| NTNK111  | Japan: Kyushu   | <i>Solanum tuberosum</i> | 1995–2000 | AB331524 | AB331539 | Ogawa T, et al, 2008 |
| NTNK114  | Japan: Kyushu   | <i>Solanum tuberosum</i> | 1995–2000 | AB331525 | AB331540 | Ogawa T, et al, 2008 |
| NTNN2    | Japan: Kyushu   | <i>Solanum tuberosum</i> | 1995–2000 | AB331520 | AB025415 | Ogawa T, et al, 2008 |
| NTNN14   | Japan: Kyushu   | <i>Solanum tuberosum</i> | 1995–2000 | AB331522 | AB042812 | Ogawa T, et al, 2008 |
| NTNNNO   | Japan: Honshu   | <i>Solanum tuberosum</i> | 1995–2000 | AB331532 | AB331545 | Ogawa T, et al, 2008 |
| NTNOK102 | Japan: Okinawa  | <i>Solanum tuberosum</i> | 1995–2000 | AB331533 | AB331546 | Ogawa T, et al, 2008 |
| NTNOK104 | Japan: Okinawa  | <i>Solanum tuberosum</i> | 1995–2000 | AB331534 | AB331547 | Ogawa T, et al, 2008 |
| NTNT     | Japan: Kyushu   | <i>Solanum tuberosum</i> | 1995–2000 | AB331527 | AB331542 | Ogawa T, et al, 2008 |
| NTNUG70  | Japan: Kyushu   | <i>Solanum tuberosum</i> | 1995–2000 | AB331530 | AB042813 | Ogawa T, et al, 2008 |

---

### Literature cited:

- Chang F, Gao F, Shen J, Zou W, Zhao S, Zhan J. 2015. Complete genome analysis of a PVY<sup>N-Wi</sup> recombinant isolate from *Solanum tuberosum* in China. *Potato research*, **58**:377-389
- Gao F, Shen J, Shi F, Fang Z, Xie L, Zhan J. 2013. Detection and molecular variation of Potato virus Y CP gene in China. *Scientia agricultura Sinica*, **46**:3125-3133
- Gao, F., Chang, F., Shen, J., Shi, F., Xie, L. and Zhan, J. 2014. Complete genome analysis of a novel recombinant isolate of potato virus Y from China. *Archives of virology*, **159**, 3439-3442.
- Gao F, Chang F, Shen J, Xie L, Zhan J. 2015. Complete genome analysis of a PVY<sup>NTN-NW</sup> recombinant isolate from Yulin of China. *Scientia agricultura Sinica*, **48**:270-279
- Hu X, He C, Xiao Y, Xiong X, Nie X. 2009. Molecular characterization and detection of recombinant isolates of *potato virus Y* from China. *Archives of virology* **154**:1303-1312
- Ogawa, T., Nakagawa, A., Hataya, T. and Ohshima, K. 2012. The genetic structure of populations of *Potato virus Y* in Japan; based on the analysis of 20 full genomic sequences. *Journal of Phytopathology*, **160**, 661-673.
- Ogawa, T., Tomitaka, Y., Nakagawa, A. and Ohshima, K. 2008. Genetic structure of a population of *Potato virus Y* inducing potato tuber necrotic ringspot disease in Japan; comparison with North American and European populations. *Virus research*, **131**, 199-212.
- Shi F, Gao F, Shen J, Chang F, Zhan J. 2014. Sequence variation of P1 gene in *Potato virus Y* isolated from Fujian province. *Herditas*, **36**: 713-722.
