# Supplementary material for: Adaptive evolution and demographic history contribute to the divergent population genetic structure of Potato virus Y between China and Japan
Source: PubMed Central journal article supplement (PMC5367074; doi:10.1111/eva.12459), 2017-03-02
Supplement: EVA-10-379-s004.pdf [file EVA-10-379-s004.pdf]

**Table S2.** List of sequences with recombinant backgrounds detected in the PVY P1 and CP genes by RDP Suites

| Gene | Recombinant                                                                                                                                                                                                                                                               | Break point<br>(nt) <sup>a</sup> | <i>P</i> -value determined using seven different programs |                        |                        |                        |                        |                        |                        |
|------|---------------------------------------------------------------------------------------------------------------------------------------------------------------------------------------------------------------------------------------------------------------------------|----------------------------------|-----------------------------------------------------------|------------------------|------------------------|------------------------|------------------------|------------------------|------------------------|
|      |                                                                                                                                                                                                                                                                           |                                  | RDP                                                       | Geneconv               | BootScan               | Maxchi                 | Chimarera              | SiScan                 | 3Seq                   |
| P1   | Lushi, Dalian, FQ06, LH02, LH05,<br>LH24, LY06, LY12, LY21, QK09,<br>QK43, QK44, QK45, QK47, XQ02,<br>XQ10, XT02, XT03, XT05, XT07,<br>XT08, ZL01, ZL06, ZL07, ZL08,<br>ZL10, ZL13, ZL14, HeB2, HeB4,<br>HeB6, HeB15, CF, CD16, CD39, CS10,<br>CS2, CS22, CS29, CS37, CS9 | 568-20                           | NS                                                        | $7.74 \times 10^{-25}$ | $8.00 \times 10^{-24}$ | $4.40 \times 10^{-16}$ | $4.07 \times 10^{-15}$ | $1.37 \times 10^{-30}$ | $1.89 \times 10^{-43}$ |
|      | CS5, Dalian, FQ06, LH02, LH24,<br>LY06, LY12, QK09, QK43, QK44,<br>QK45, QK47, XQ02, XQ10, XT02,<br>XT03, XT05, XT07, XT08, ZL01,<br>ZL06, ZL07, ZL08, ZL10, ZL13, ZL14,<br>HeB2, HeB4, HeB6, HeB15,<br>CF_YL21, CD16, CD39, CS10, CS2,<br>CS22, CS37, CS9                | 819-310                          | NS                                                        | $1.48 \times 10^{-21}$ | NS                     | $3.85 \times 10^{-17}$ | $3.84 \times 10^{-18}$ | $4.34 \times 10^{-19}$ | $2.34 \times 10^{-39}$ |
| CP   | LH05                                                                                                                                                                                                                                                                      | 426-567                          | $4.62 \times 10^{-14}$                                    | $1.24 \times 10^{-12}$ | $1.27 \times 10^{-02}$ | $2.32 \times 10^{-09}$ | $8.98 \times 10^{-10}$ | $5.76 \times 10^{-12}$ | $7.88 \times 10^{-19}$ |
|      | ZL09                                                                                                                                                                                                                                                                      | 796-310                          | NS                                                        | $8.60 \times 10^{-08}$ | $3.19 \times 10^{-06}$ | $1.07 \times 10^{-12}$ | $3.10 \times 10^{-08}$ | $4.18 \times 10^{-14}$ | $5.74 \times 10^{-17}$ |
|      | CS28                                                                                                                                                                                                                                                                      | 424-31                           | $2.47 \times 10^{-03}$                                    | $1.57 \times 10^{-02}$ | NS                     | $5.29 \times 10^{-09}$ | $1.53 \times 10^{-05}$ | $1.69 \times 10^{-02}$ | $4.68 \times 10^{-08}$ |
|      | Laiwu9, CS10, CS13, CS14, CS26,<br>CS27, NTNHIR3, NTNKGAM2,<br>NTNTK1, T13,                                                                                                                                                                                               | 766-568                          | NS                                                        | $3.14 \times 10^{-08}$ | $1.51 \times 10^{-06}$ | $3.92 \times 10^{-07}$ | $2.51 \times 10^{-06}$ | $2.86 \times 10^{-08}$ | $3.04 \times 10^{-10}$ |

<sup>a</sup>, the break points listed refer to their position in the alignment;

NS, No significant *P*-value was recorded for this recombination event using this method.
