# Supplementary material for: Adaptive evolution and demographic history contribute to the divergent population genetic structure of Potato virus Y between China and Japan
Source: PubMed Central journal article supplement (PMC5367074; doi:10.1111/eva.12459), 2017-03-02
Supplement: EVA-10-379-s005.pdf [file EVA-10-379-s005.pdf]

**Table S3. Haplotype diversity assessed by bootstrap resampling with 1000 replicates**

| Gene | Country | Haplotype diversity | 95% Confidence intervals | P-value             |
|------|---------|---------------------|--------------------------|---------------------|
| P1   | China   | 0.988               | 0.970 - 0.998            | 0.990 <sup>ns</sup> |
|      | Japan   | 0.989               | 0.972 - 0.998            | 0.098 <sup>ns</sup> |
| CP   | China   | 0.967               | 0.924 - 0.989            | 1.000 <sup>ns</sup> |
|      | Japan   | 0.972               | 0.936 - 0.991            | 0.050 <sup>*</sup>  |

<sup>ns</sup>, not significant; <sup>\*</sup>,  $0.01 < P\text{-value} < 0.05$ ; <sup>\*\*</sup>,  $0.001 < P\text{-value} < 0.01$ ; <sup>\*\*\*</sup>,  $P\text{-value} < 0.001$
